# Supplementary material for: Integrated Approach to Hydrogeochemical Appraisal and Quality Assessment of Groundwater from Sargodha District, Pakistan
Source: Hindawi journal article supplement (doi:10.1155/2020/6621038), 2020-12-29
Supplement: f1 [file 6621038.f1.pdf]

## Supplementary Material

Table S1. Analytical methods used for different parameters in the present study

| S. No. | Parameters                               | Analytical Method                                  | Reference |
|--------|------------------------------------------|----------------------------------------------------|-----------|
| 1.     | Bicarbonate                              | 2320, Standard method (1992)                       | [1]       |
| 2.     | Calcium (mg/L)                           | 3500-Ca-D, Standard Method (1992)                  | [2]       |
| 3.     | Chloride (mg/L)                          | Titration (Silver Nitrate), Standard Method (1992) | [3]       |
| 4.     | Conductivity ( $\mu\text{S}/\text{cm}$ ) | EC meter, Hach-44600-00, USA                       | [4]       |
| 5.     | Hardness (mg/L)                          | EDTA Titration, Standard Method (1992)             | [5]       |
| 6.     | Magnesium (mg/L)                         | 2340-C, Standard Method (1992)                     | [6]       |
| 7.     | pH                                       | pH Meter, Hanna Instrument Model 8519, Italy       | [7]       |
| 8.     | Potassium (mg/L)                         | Flame photometer PFP7, UK                          | [8]       |
| 9.     | Sodium (mg/L)                            | Flame photometer PFP7, UK                          | [8]       |
| 10.    | Sulfate (mg/L)                           | SulfaVer4 (Hach-8051) by Spectrophotometer         | [9]       |
| 11.    | TDS (mg/L)                               | 2540C, Standard method (1992)                      | [10]      |

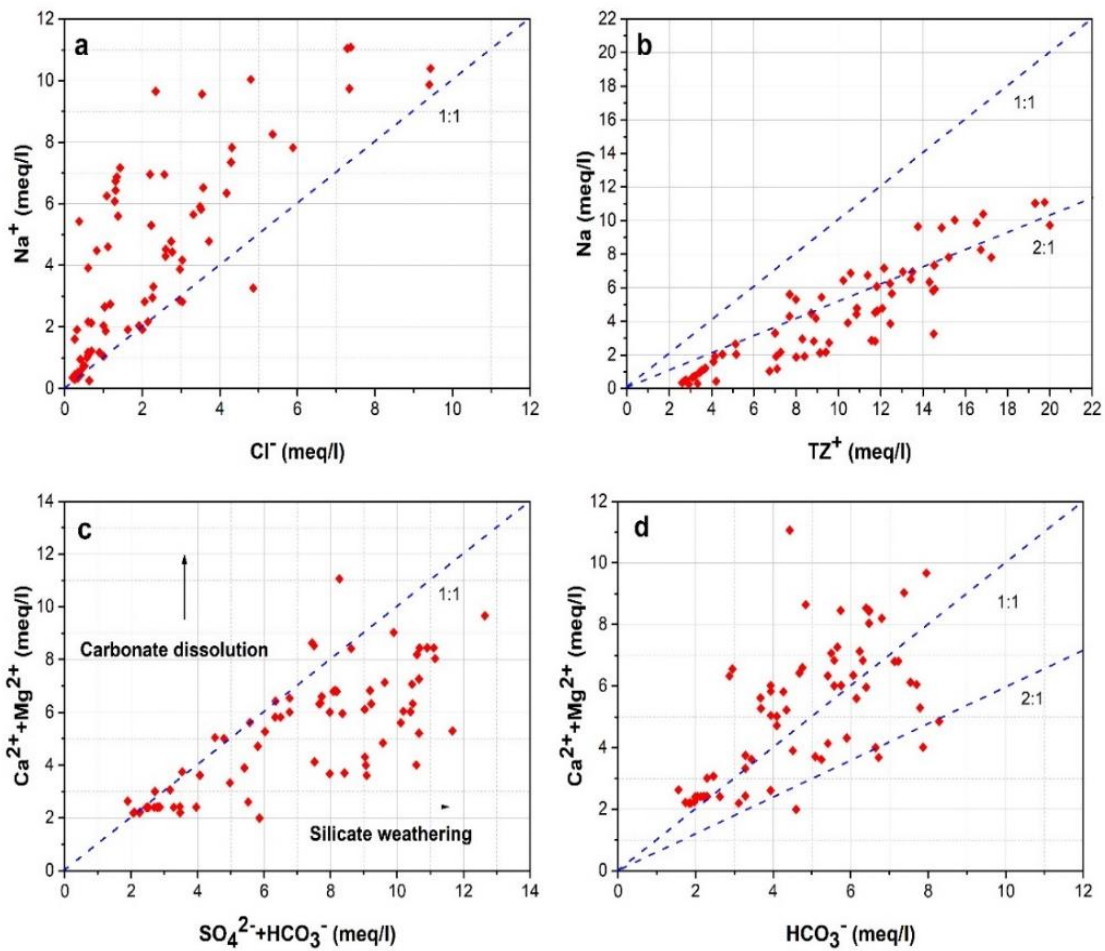

**Figure S1.** Relationship between ions (a) Na<sup>+</sup> versus Cl<sup>-</sup>; (b) Na<sup>+</sup> versus TZ<sup>+</sup>; (c) Ca<sup>2+</sup> + Mg<sup>2+</sup> versus HCO<sub>3</sub><sup>-</sup>; (d) Ca<sup>2+</sup> + Mg<sup>2+</sup> versus SO<sub>4</sub><sup>2-</sup> + HCO<sub>3</sub><sup>-</sup>

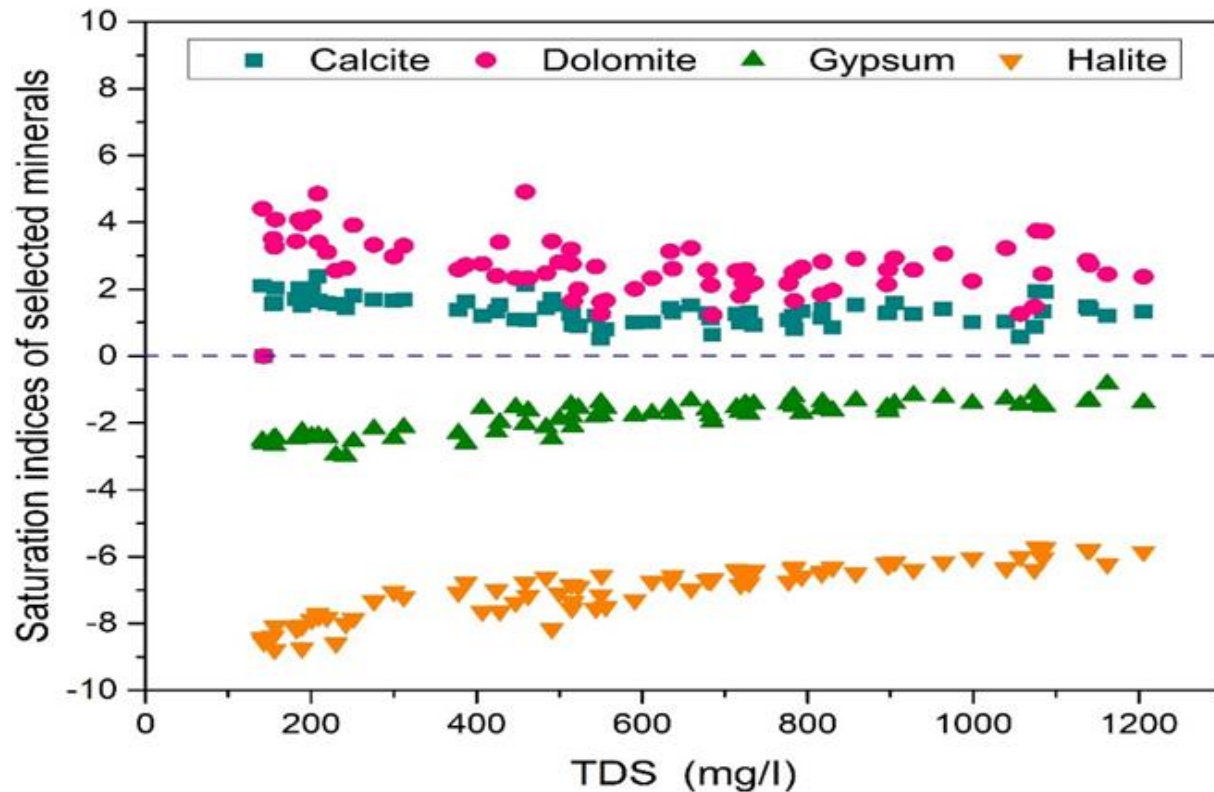

Figure S2: Saturation Indices of selected mineral

#### Reference

- [1] American Public Health Association, "APHA Method 2320: Standard Methods for the Examination of Water and Wastewater," 1992.
- [2] A. P. H. Association, "APHA Method 3500-CA:Standard Methods for the Examination of Water and Wastewater", 1992.
- [3] AMERICAN PUBLIC HEALTH ASSOCIATION, "Titration (Silver Nitrate):Standard Methods for the Examination of Water and Wastewater", 1992.
- [4] H. C. M. 44600 C. M. M. 1989, "HACH Company Model 44600 Conductivity/TDS Meter Manual." .
- [5] A. P. H. ASSOCIATION, "EDTA Titration:Standard Methods for the Examination of Water and Wastewater", 1992.
- [6] American Public Health Association, "2340-C:Standard Methods for the Examination of Water and Wastewater", 1992.

- [7] pH Meter, Hanna Instrument Model 8519, Instruction Manual. 1995.
- [8] Flame Photometer Models PFP7 and PFP7/C: Instruction Manual 500 795/REV E/03-17.
- [9] DR/4000 PROCEDURE SulfaVer 4 Method 8051, user manual.
- [10] American Public Health Association, "2540C" Standard Methods for the Examination of Water and Wastewater," 1992.
